# Supplementary material for: Electrocardiographic Changes with Age in Japanese Patients with Noonan Syndrome
Source: MDPI journal article supplement (doi:10.3390/jcdd11010010), 2023-12-28
Supplement: s1 [file s1]

Table S1

| Group             | Pre-surgery | Post-surgery | <i>p</i> |
|-------------------|-------------|--------------|----------|
| n                 | 21          | 21           |          |
| RAD (%)           | 10 (47.6)   | 9 (42.8)     | 1        |
| LAD (%)           | 9 (42.8)    | 5 (23.8)     | 0.326    |
| RBBB (%)          | 10 (47.6)   | 12 (57.1)    | 0.523    |
| LBBB (%)          | 0 (0.0)     | 1 (4.7)      | 1        |
| LVH (%)           | 1 (4.7)     | 1 (4.7)      | 1        |
| RVH (%)           | 3 (14.2)    | 1 (4.7)      | 0.606    |
| Abnormal Q (%)    | 3 (14.2)    | 4 (19.0)     | 1        |
| ST elevation (%)  | 0 (0.0)     | 1 (4.7)      | 1        |
| ST depression (%) | 0 (0.0)     | 1 (4.7)      | 1        |
| negative T (%)    | 1 (4.7)     | 1 (4.7)      | 1        |
| AV block (%)      | 0 (0.0)     | 0 (0.0)      | 1        |
| PAC (%)           | 0 (0.0)     | 0 (0.0)      | 1        |
| PVC (%)           | 0 (0.0)     | 0 (0.0)      | 1        |
| wide QRS (%)      | 3 (14.2)    | 5 (23.8)     | 0.696    |
| Small R (%)       | 5 (23.8)    | 6 (28.5)     | 1        |

RAD, right-axis deviation; LAD, left-axis deviation; RBBB, right bundle branch block; LBBB, left bundle branch block; LVH, left ventricular hypertrophy; RVH, right ventricular hypertrophy; abnormal Q, abnormal Q wave; negative T, negative T wave; AV block, atrioventricular block; PAC, premature atrial contraction; PVC, premature ventricular contraction; Small R wave, small R wave in V6.

Table S2

|              | genetic diagnosis (n=15) | clinical diagnosis (n=31) | <i>p</i> |
|--------------|--------------------------|---------------------------|----------|
| RAD          | 8/15 (53.3)              | 18/31 (58.1)              | >0.99    |
| LAD          | 6/15 (40.0)              | 11/31 (35.4)              | >0.99    |
| RBBB         | 7/15 (46.6)              | 9/31 (29.0)               | 0.32     |
| Abnormal Q   | 1/15 (6.7)               | 6/31 (19.3)               | 0.39     |
| Wide QRS     | 0/15 (0.0)               | 2/31 (6.4)                | >0.99    |
| Small R wave | 4/15 (26.6)              | 11/31 (35.4)              | 0.73     |

RAD, right-axis deviation; LAD, left-axis deviation; RBBB, right bundle branch block; abnormal Q, abnormal Q wave; negative T, negative T wave; Small R wave, small R wave in V6.
